# Supplementary material for: Different Kinetics of Serum ADAMTS13, GDF-15, and Neutrophil Gelatinase-Associated Lipocalin in the Early Phase of Aneurysmal Subarachnoid Hemorrhage
Source: MDPI journal article supplement (doi:10.3390/ijms241311005), 2023-07-02
Supplement: s1 [file s1]

Table S1. Serum levels of ADAMTS13, GDF-15 and NGAL according to 3-month functional outcome.

|              | Favorable at D90 (n=70)   |                     |        | Unfavorable at D90 (n=80) |                     |        |         |
|--------------|---------------------------|---------------------|--------|---------------------------|---------------------|--------|---------|
|              | Median                    | Interquartile range |        | Median                    | Interquartile range |        | p-value |
| ADAMTS13 /D1 | 2747,4                    | 1826,4              | 3078,7 | 2352,9                    | 1798,7              | 2897,0 | 0.213   |
| ADAMTS13 /D3 | 2247,2                    | 1829,5              | 2954,1 | 2431,7                    | 1869,9              | 2959,0 | 0.525   |
| ADAMTS13 /D5 | 2558,3                    | 2052,1              | 2878,9 | 2617,0                    | 1927,2              | 3153,1 | 0.356   |
| ADAMTS13 /D7 | 2522,4                    | 2002,9              | 2931,5 | 2574,5                    | 1820,2              | 3121,6 | 0.742   |
| ADAMTS13 /D9 | 2663,9                    | 2130,3              | 3616,8 | 2341,8                    | 2041,9              | 3044,2 | 0.188   |
|              | P <sub>trend</sub> =0.254 |                     |        | P <sub>trend</sub> =0.268 |                     |        |         |
| GDF-15 /D1   | 2,6                       | 1,9                 | 4,7    | 4,3                       | 3,2                 | 6,9    | <0.001  |
| GDF-15 /D3   | 2,4                       | 1,4                 | 3,8    | 4,8                       | 4,0                 | 6,3    | <0.001  |
| GDF-15 /D5   | 2,3                       | 1,5                 | 3,0    | 5,0                       | 3,5                 | 10,0   | <0.001  |
| GDF-15 /D7   | 2,2                       | 1,6                 | 3,2    | 6,2                       | 3,9                 | 10,5   | <0.001  |
| GDF-15 /D9   | 2,4                       | 1,6                 | 3,5    | 5,3                       | 3,1                 | 11,1   | <0.001  |
|              | P <sub>trend</sub> =0.950 |                     |        | P <sub>trend</sub> =0.265 |                     |        |         |
| NGAL /D1     | 430,3                     | 250,4               | 696,4  | 513,0                     | 360,9               | 721,6  | 0.144   |
| NGAL /D3     | 306,3                     | 207,1               | 686,0  | 516,9                     | 264,3               | 881,4  | 0.086   |
| NGAL /D5     | 304,6                     | 222,7               | 537,6  | 380,4                     | 315,7               | 705,2  | 0.049   |
| NGAL /D7     | 382,2                     | 253,2               | 538,5  | 513,2                     | 312,4               | 697,9  | 0.030   |
| NGAL /D9     | 398,5                     | 299,0               | 581,6  | 500,3                     | 370,5               | 818,7  | 0.101   |
|              | P <sub>trend</sub> =0.431 |                     |        | P <sub>trend</sub> =0.771 |                     |        |         |

*ADAMTS13* a disintegrin and metalloproteinase with a thrombospondin type 1 motif, member 13, *NGAL* neutrophil gelatinase-associated lipocalin, *GDF-15* Growth differentiation factor-15, *Favorable D90* modified Rankin score at 3-month follow-up: 0-2, *Unfavorable at D90* modified Rankin score at 3-month follow-up: 3-6

Table S2. Serum levels of GDF-15, NGAL and ADAMTS13 in different groups of macrovascular vasospasm and delayed cerebral ischemia.

| Marker /Time points | Macrovascular vasospasm negative group (n=109) |               |               |                    |               |               |              |
|---------------------|------------------------------------------------|---------------|---------------|--------------------|---------------|---------------|--------------|
|                     | DCI negative, n=98                             |               |               | DCI positive, n=11 |               |               | p-value      |
|                     | Median                                         | Percentile 25 | Percentile 75 | Median             | Percentile 25 | Percentile 75 |              |
| GDF-15 /D1          | 3,758                                          | 2,4035        | 5,174         | 3,6545             | 2,872         | 5,435         | 0.794        |
| GDF-15 /D3          | 3,423                                          | 1,771         | 4,592         | 5,5085             | 4,68          | 14,422        | <b>0.02</b>  |
| GDF-15 /D5          | 2,708                                          | 1,952         | 4,98          | 4,7125             | 3,855         | 8,011         | <b>0.049</b> |
| GDF-15 /D7          | 3,228                                          | 1,731         | 6,0105        | 5,1625             | 3,24          | 14,276        | 0.153        |
| GDF-15 /D9          | 3,0825                                         | 1,8035        | 5,1965        | 6,241              | 3,079         | 8,064         | 0.186        |
| NGAL /D1            | 366,9885                                       | 251,038       | 541,368       | 436,533            | 276,732       | 514,948       | 0.592        |
| NGAL /D3            | 287,417                                        | 181,186       | 453,079       | 404,106            | 229,53        | 726,464       | 0.391        |
| NGAL /D5            | 303,352                                        | 216,698       | 389,238       | 335,732            | 245,348       | 366,782       | 0.878        |
| NGAL /D7            | 406,927                                        | 270,518       | 552,6265      | 430,499            | 234,816       | 558,879       | 0.880        |
| NGAL /D9            | 398.5                                          | 299.328       | 618.3055      | 614.81             | 500.096       | 835.285       | 0.177        |

|                                               |          |               |               |                     |               |               |         |
|-----------------------------------------------|----------|---------------|---------------|---------------------|---------------|---------------|---------|
| ADAMTS13 /D1                                  | 2577,727 | 1923,7205     | 3108,325      | 2914,528            | 2398,486      | 3416,574      | 0.222   |
| ADAMTS13 /D3                                  | 2199,731 | 1834,775      | 2959,015      | 2807,846            | 2418,299      | 3383,25       | 0.087   |
| ADAMTS13 /D5                                  | 2656,68  | 2044,503      | 3429,4215     | 2925,866            | 2198,116      | 3148,139      | 0.139   |
| ADAMTS13 /D7                                  | 2656,68  | 2044,503      | 3429,4215     | 2925,866            | 2198,116      | 3148,139      | 0.917   |
| ADAMTS13 /D9                                  | 2663,941 | 2178,969      | 3308,0335     | 3044,188            | 2942,367      | 3190,878      | 0.239   |
| Macrovascular vasospasm positive group (n=41) |          |               |               |                     |               |               |         |
| DCI negative (n=12)                           |          |               |               | DCI positive (n=29) |               |               |         |
|                                               | Median   | Percentile 25 | Percentile 75 | Median              | Percentile 25 | Percentile 75 | p-value |
| GDF-15 /D1                                    | 4,1485   | 2,867         | 4,639         | 3,452               | 2,252         | 4,483         | 0.661   |
| GDF-15 /D3                                    | 1,699    | 0,89          | 6,086         | 4,0815              | 2,794         | 4,863         | 0.469   |
| GDF-15 /D5                                    | 2,239    | 1,537         | 5,3995        | 4,108               | 3,087         | 6,037         | 0.142   |
| GDF-15 /D7                                    | 2,32     | 1,792         | 5,804         | 3,916               | 3,266         | 6,333         | 0.280   |
| GDF-15 /D9                                    | 2,357    | 1,726         | 4,526         | 4,541               | 2,797         | 5,237         | 0.260   |
| NGAL /D1                                      | 335,705  | 171,895       | 1365,2135     | 719,517             | 491,892       | 999,331       | 0.226   |
| NGAL /D3                                      | 281,272  | 219,221       | 1196,846      | 649,1015            | 292,437       | 881,411       | 0.692   |
| NGAL /D5                                      | 350,544  | 120,8295      | 1202,483      | 375,7145            | 331,341       | 691,083       | 0.733   |
| NGAL /D7                                      | 237,75   | 168,964       | 664,818       | 648,411             | 513,248       | 988,408       | 0.104   |
| NGAL /D9                                      | 275,983  | 176,605       | 879,4105      | 488,748             | 441,01        | 739,118       | 0.260   |
| ADAMTS13 /D1                                  | 2215,062 | 1366,4655     | 3795,6405     | 2398,486            | 1941,256      | 2897,041      | 0.851   |
| ADAMTS13 /D3                                  | 1747,751 | 1007,848      | 2758,342      | 2142,521            | 1869,904      | 2445,025      | 0.573   |
| ADAMTS13 /D5                                  | 2159,995 | 1308,1355     | 3594,823      | 2357,344            | 1699,706      | 3023,792      | 0.988   |
| ADAMTS13 /D7                                  | 2028,011 | 1843,994      | 3038,9195     | 2235,72             | 1598,328      | 2714,918      | 0.753   |
| ADAMTS13 /D9                                  | 2074,699 | 1545,238      | 2502,9625     | 2041,863            | 1698,682      | 3252,335      | 0.903   |
